# Supplementary material for: Immunophenotypic Analysis of Acute Megakaryoblastic Leukemia: A EuroFlow Study
Source: MDPI journal article supplement (doi:10.3390/cancers14061583), 2022-03-21
Supplement: s1 [file s1]

A.

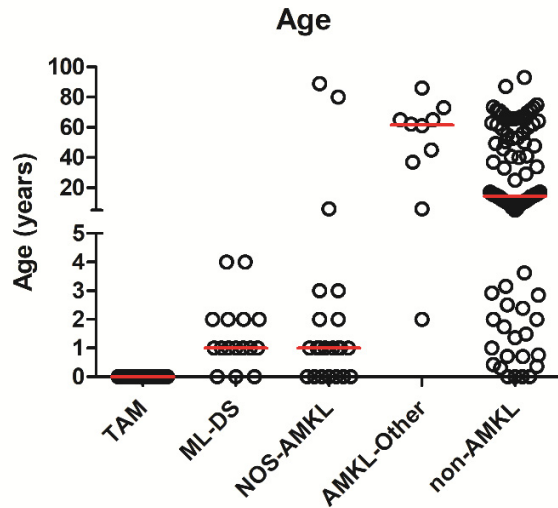

B.

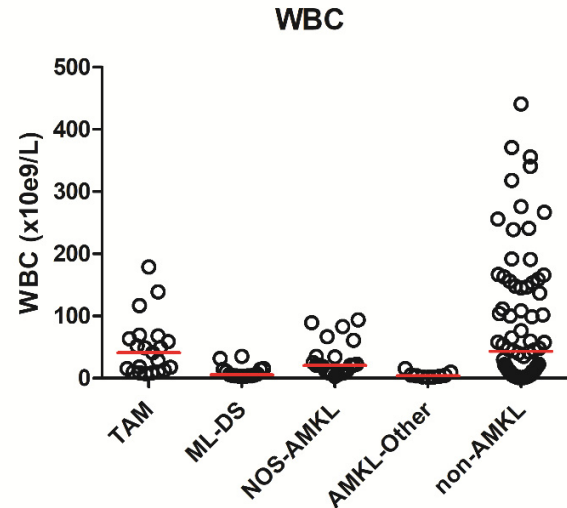

**Supplementary Figure S1. A.** Age (in years) of the patients included in the various subgroups. Age was significantly different between the all groups, except for ML-DS versus NOS-AMKL (Kruskal-Wallis test, if  $p < 0.05$  followed by Mann-Whitney test,  $p < 0.05$ ). **B.** WBC counts ( $10^9/L$ ) of the patients included in the various subgroups. WBC counts were significantly lower in ML-DS and AMKL-Other as compared to the other subgroups (Kruskal-Wallis test, if  $p < 0.05$  followed by Mann-Whitney test,  $p < 0.05$ ). Subgroups included TAM ( $n=24$ ), ML-DS ( $n=16$ ), NOS-AMKL ( $n=22$ ), AMKL-Other ( $n=10$ ), and non-AMKL ( $n=114$ ). Red bars indicate median values.

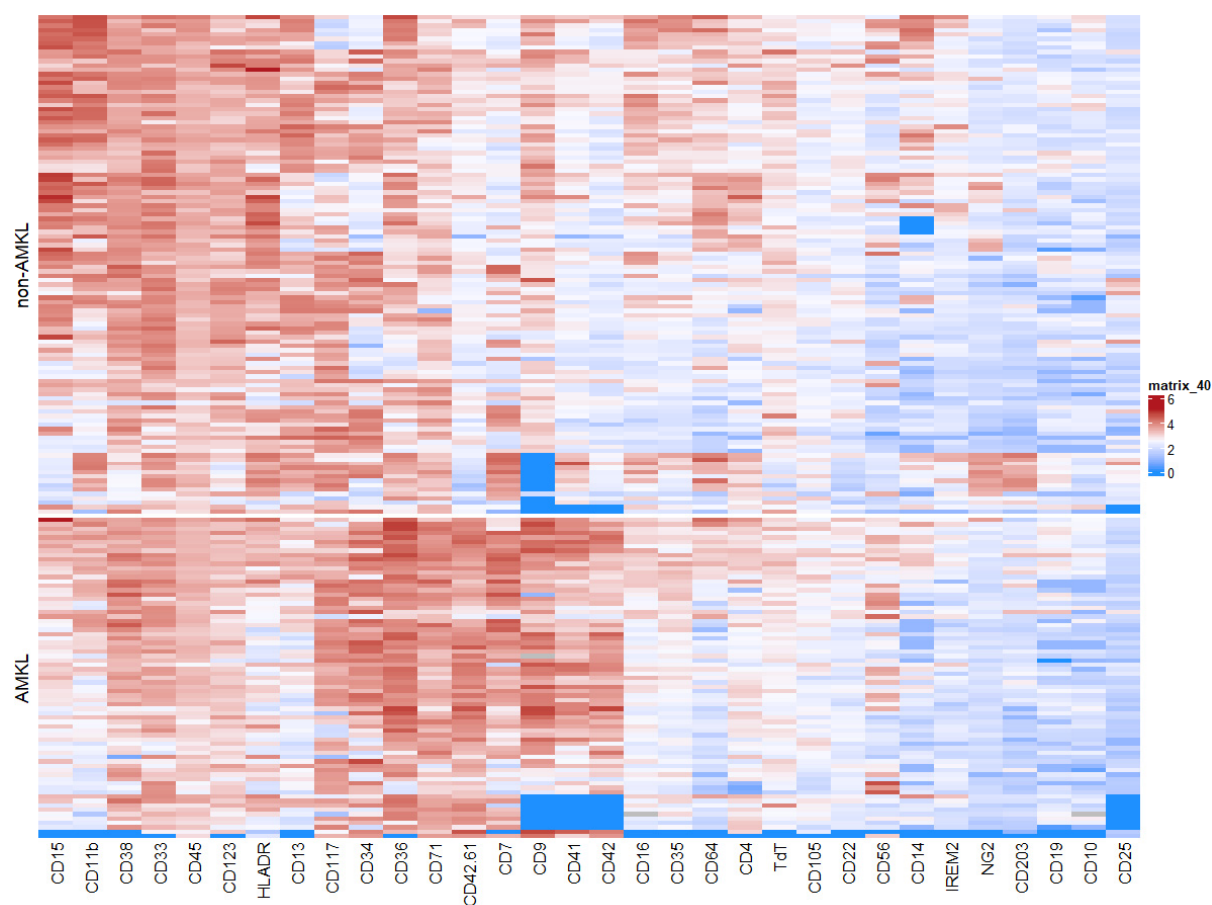

**Supplementary Figure S2.** Immunophenotypic profile of AMKL and non-AMKL patients. Data show the mean fluorescence intensity of the markers as specified on the x-axis, whereas each row represents a specific AML patient. Data were log10 transformed. Missing data are represented as 0 (darkest blue color).

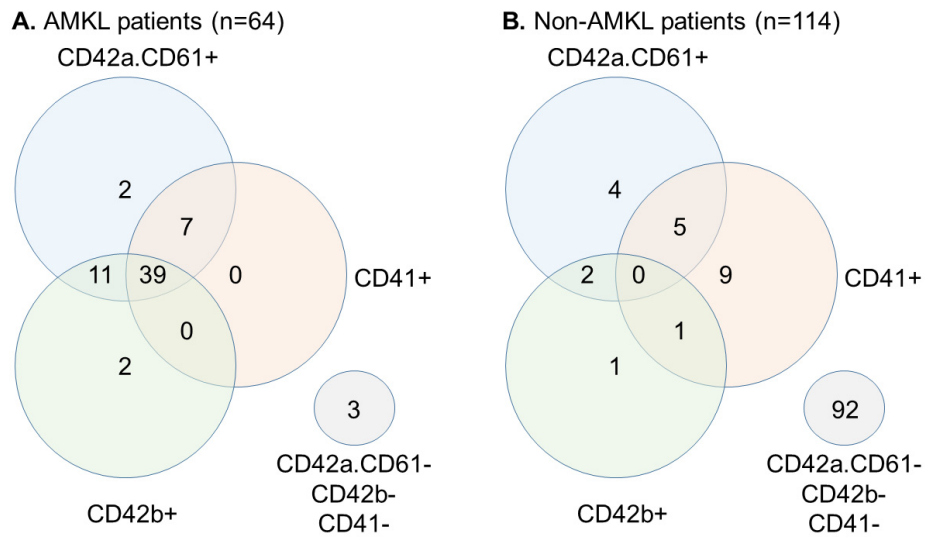

**Supplementary Figure S3.** Expression of megakaryocytic markers in AMKL (**A.**) and non-AMKL (**B.**) patients. Only AMKL and non-AMKL patients with complete flowcytometric data from EuroFlow AML panel tube 6 and 7 available were included.

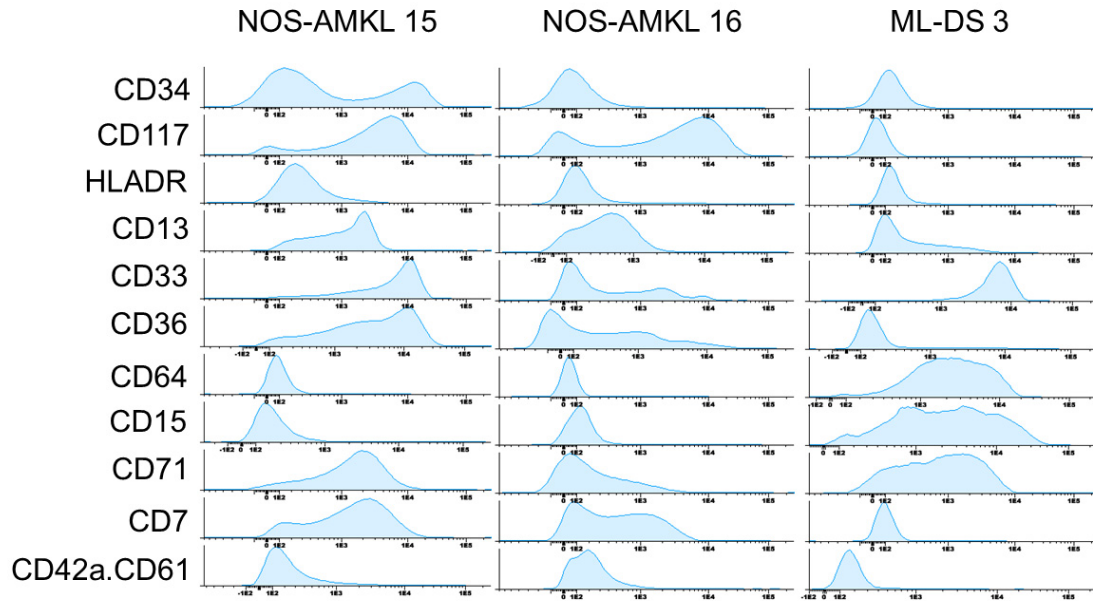

**Supplementary Figure S4.** Immunophenotypic profile of three AMKL patients lacking expression of CD41, CD42a, CD42b and CD61. Histograms for various markers are shown, with MFI values on the x-axis and number of events on the y-axis.

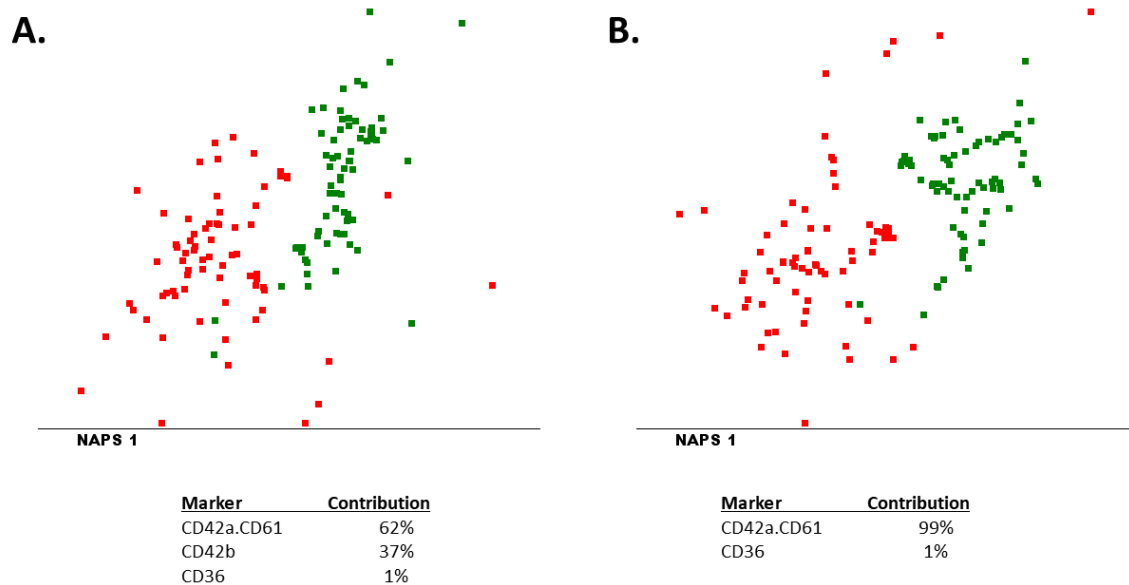

**Supplementary Figure S5.** Multivariate analysis of CD34+/CD117+ cells from non-AMKL (green symbols) and AMKL patients (red symbols) using EuroFlow AML tube 1-7 (**A.**) or tube 1-6 (**B.**). Pattern classification was performed using NAPS and the markers contributing to the pattern classification are shown in the bottom part of the figure. Only cases with >100 CD34+/CD117+ cells were included in the analysis (72 AMKL, 71 non-AMKL).

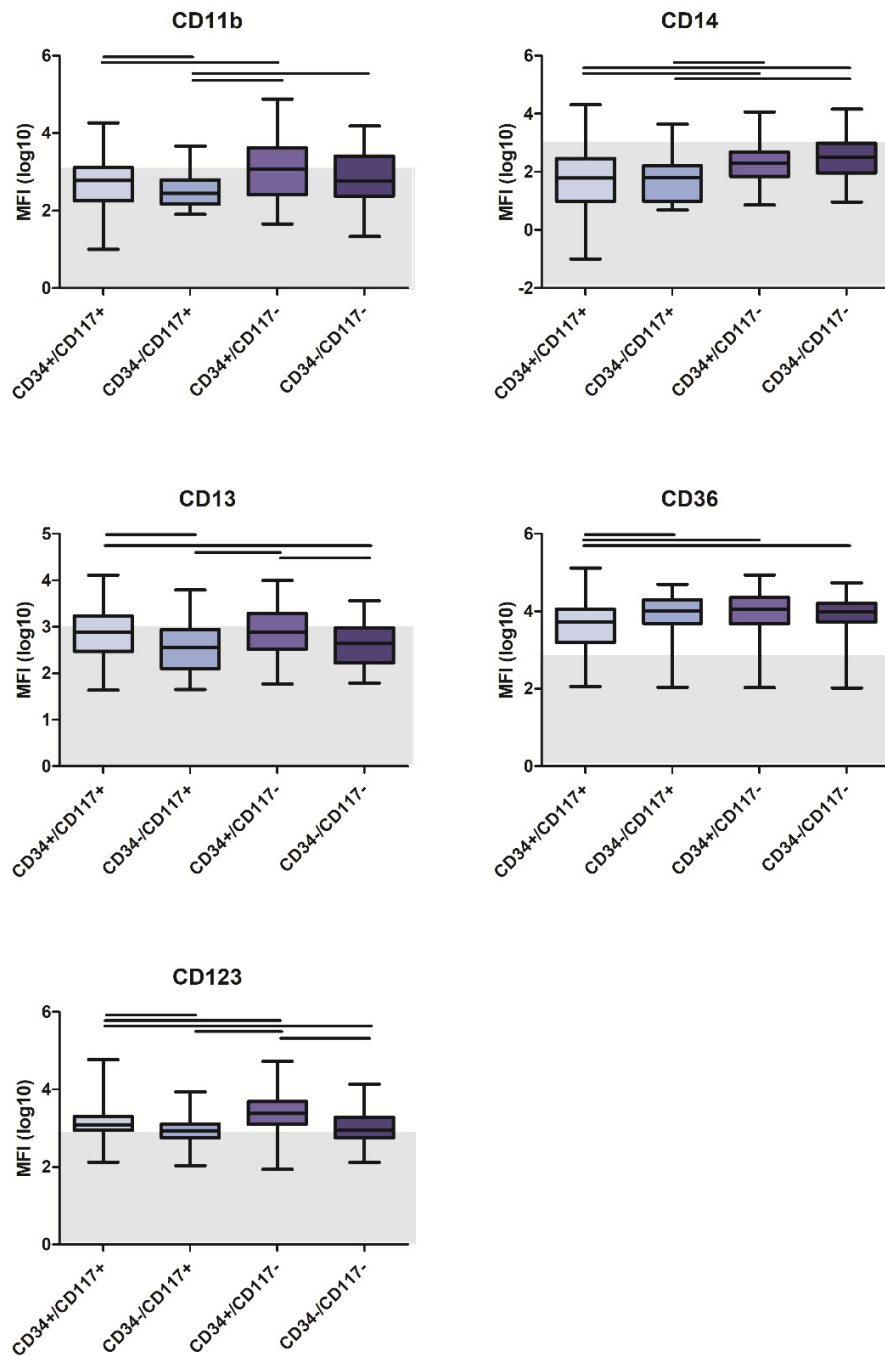

**Supplementary Figure S6.** Expression of markers on AMKL maturation subsets CD34+/CD117+, CD34-/CD117+, CD34+/CD117-, and CD34-/CD117-. Data represent the MFI values after log10 transformation. Horizontal base between populations indicate significant differences (Kruskal-Wallis, if  $p < 0.05$  followed by

Mann Whitney test;  $p < 0.05$ ). The grey zone indicates MFI levels  $< 1000$ , markers with such MFI values were considered to be negative.

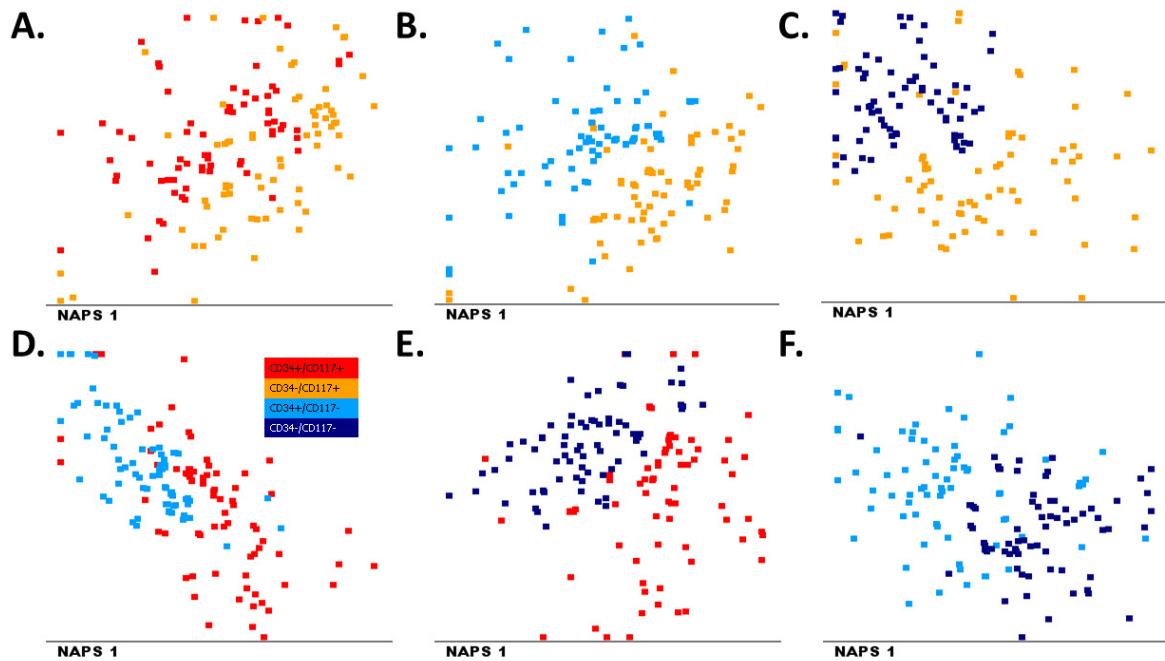

**Supplementary Figure S7.** Multidimensional analysis of four maturation stages of AMKL cells. **A.** CD34+/CD117+ versus CD34-/CD117+ (contributing markers: CD10 (14%); HLADR (9%), CD33 (8%)); **B.** CD34+/CD117+ versus CD34+/CD117- (contributing markers: CD10 (44%); CD22 (40%), CD14 (15%)); **C.** CD34+/CD117+ versus CD34-/CD117- (contributing markers: CD14 (96%); CD7 (2%), CD15 (1%)); **D.** CD34-/CD117+ versus CD34+/CD117- (contributing markers: CD14 (99%); HLADR (0.1%), CD13 (0.1%)); **E.** CD34-/CD117+ versus CD34-/CD117- (contributing markers: CD14 (57%); CD38 (25%), CD33 (15%)); **F.** CD34+/CD117- versus CD34-/CD117- (contributing markers: CD16 (33%), CD35 (30%), CD36 (12%)). Note that markers CD34 and CD117 were excluded from the analysis, as they were used for subgroup definitions.

**Supplementary Table S1.** Detailed information from the 22 non-AMKL patients that expressed at least one megakaryocytic marker. Markers with an MFI value above 1000 are marked in color.

| Patient | CD117 | CD13  | CD11b | HLADR  | CD14  | CD64  | CD36  | CD33  | CD42a.CD42b | CD41 | final diagnosis (WHO)                         | gender | age |
|---------|-------|-------|-------|--------|-------|-------|-------|-------|-------------|------|-----------------------------------------------|--------|-----|
| 1       | 869   | 8396  | 16006 | 2778   | 2907  | 3076  | 6050  | 5862  | 1418        | 493  | 2092 Therapy-related myeloid neoplasms        | M      | 6   |
| 2       | 3127  | 6450  | 638   | 229    | 160   | 345   | 471   | 12753 | 423         | 1197 | 460 AML with t(15;17)                         | M      | 17  |
| 3       | 12055 | 1602  | 1696  | 1499   | 54    | 976   | 6245  | 1820  | 1882        | 1255 | 842 Acute myelomonocytic leukemia             | F      | 14  |
| 4       | 4025  | 8257  | 15739 | 1354   | 196   | 4121  | 1176  | 7712  | 1090        | 499  | 818 Acute myelomonocytic leukemia             | F      | 9   |
| 5       | 874   | 4449  | 9974  | 10215  | 532   | 4117  | 7801  | 3153  | 2878        | 480  | 4749 Acute monoblastic and monocytic leukemia | F      | 16  |
| 6       | 633   | 5303  | 2620  | 110775 | 93    | 2228  | 3089  | 5939  | 1050        | 227  | 516 Acute myelomonocytic leukemia             | F      | 10  |
| 7       | 938   | 10405 | 8766  | 447    | 520   | 947   | 1120  | 1963  | 549         | 822  | 1212 AML with t(15;17)                        | M      | 10  |
| 8       | 51    | 8060  | 33233 | 668    | 7527  | 1308  | 9410  | 11654 | 1967        | 304  | 489 AML with t(9;11)                          | M      | 0   |
| 9       | 1416  | 11991 | 1225  | 9809   | 437   | 1176  | 1304  | 6200  | 1145        | 574  | 2028 AML with t(9;11)                         | F      | 15  |
| 10      | 64    | 10229 | 34056 | 929    | 6545  | 1594  | 12414 | 4013  | 3315        | 879  | 4672 AML with t(9;11)                         | F      | 0   |
| 11      | 1697  | 338   | 3888  | 51319  | 355   | 1866  | 7863  | 7055  | 3100        | 396  | 7493 AML with t(9;11)                         | M      | 0   |
| 12      | 54    | 702   | 9406  | 4225   | 7993  | 3400  | 16248 | 4879  | 846         | 515  | 1750 AML with t(9;11)                         | F      | 10  |
| 13      | 3160  | 3917  | 10198 | 2014   | 272   | 2245  | 3663  | 6529  | 135         | 983  | 32823 AML with myelodysplasia-related changes | M      | 62  |
| 14      | 385   | 2014  | 9008  | 8727   | 1262  | 26207 | 5940  | 3783  | 141         | 252  | 2050 AML with mutated NPM1                    | F      | 55  |
| 15      | 502   | 5251  | 8467  | 13354  | 1800  | 8540  | 9384  | 11022 | 248         | 362  | 1507 AML with mutated NPM1                    | M      | 71  |
| 16      | 2921  | 2273  | 4462  | 8062   | 241   | 2279  | 2545  | 842   | 75          | 208  | 1108 AML with mutated CEBPA                   | F      | 40  |
| 17      | 5469  | 5630  | 4312  | 11354  | 379   | 16700 | 3234  | 7884  | 60          | 217  | 1662 AML with mutated NPM1                    | M      | 29  |
| 18      | 8337  | 8896  | 11885 | 3087   | 1274  | 2510  | 2827  | 5404  | 102         | 319  | 2505 AML with maturation                      | F      | 63  |
| 19      | 774   | 10915 | 18047 | 1417   | 211   | 600   | 2570  | 15901 | 1140        | 682  | 333 AML with mutated NPM1                     | M      | 50  |
| 20      | 369   | 1913  | 6207  | 10453  | 1182  | 158   | 3917  | 1188  | 1627        | 1165 | 464 AML without maturation                    | F      | 69  |
| 21      | 2285  | 5629  | 30661 | 3902   | 939   | 372   | 1496  | 10429 | 621         | 586  | 1763 Acute myelomonocytic leukemia            | F      | 73  |
| 22      | 883   | 5971  | 37417 | 45657  | 16365 | 22542 | 42191 | 14038 | 611         | 1656 | 1215 AML with mutated NPM1                    | F      | 65  |
